# Supplementary material for: Investigation of oxidative DNA damage levels of healthcare workers exposed to radiation
Source: Research Square preprint supplement (doi:10.21203/rs.3.rs-5798927/v1), 2025-05-06
Supplement: Supplementary file 1 [file 247c84c3a19668fe02c0625e.pdf]

## Supplementary file

5\*5 risk assessment of occupational health and safety unit

| COLOR  | POINT       | DESCRIPTION                                                                                                         |
|--------|-------------|---------------------------------------------------------------------------------------------------------------------|
| GREEN  | 0.1 - 1.5   | The factor is in the environment but does not generate risks.                                                       |
| BLUE   | 1.6 - 6.5   | The risk factor is present, and it is under control or does not result in unrepairable persistent consequences.     |
| YELLOW | 6.6 - 12.5  | The factor could lead to health problems or outcomes. It might generate problems during control.                    |
| RED    | 12.6 – 20.5 | The factor could cause open and urgent health problems. Precaution is absolutely important.                         |
| PURPLE | 20.6 – 25.0 | The control of the fact matters vital, consequences could be lethal. It is not possible to work on that risk level. |

### COLOR POINT DESCRIPTION

GREEN 0.1 - 1.5 The factor is in the environment but does not generate risks.

BLUE 1.6 - 6.5 The Risk factor is present, and it is under control or does not result in unrepairable persistent consequences.

YELLOW 6.6 - 12.5 The factor could lead to health problems or outcomes. It might generate problems during control.

RED 12.6 – 20.5 The factor could cause open and urgent health problems. Precaution is absolutely important.

PURPLE 20.6 – 25.0 The control of the fact matters is vital, and the consequences could be lethal. It is not possible to work on that risk level.
